# Supplementary material
Source: PubMed Central journal article supplement (PMC2654514)

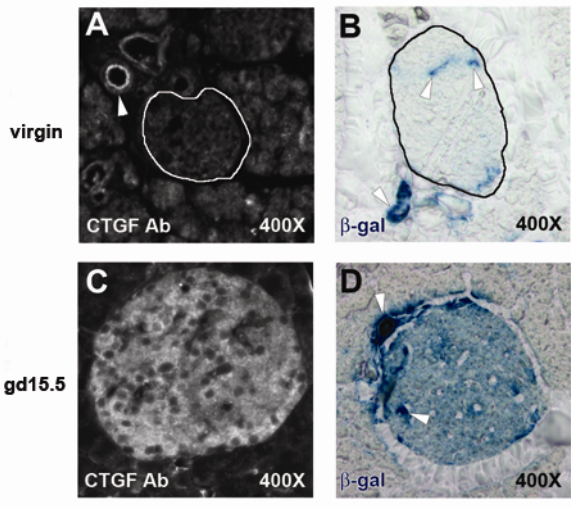

Supplement: me.2008-0045_1.pdf [file me.2008-0045_1.pdf]

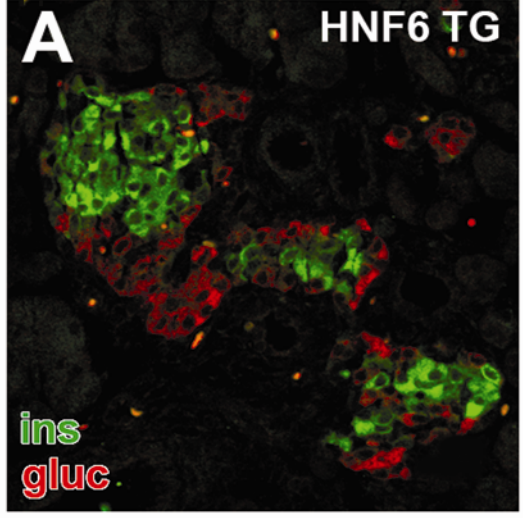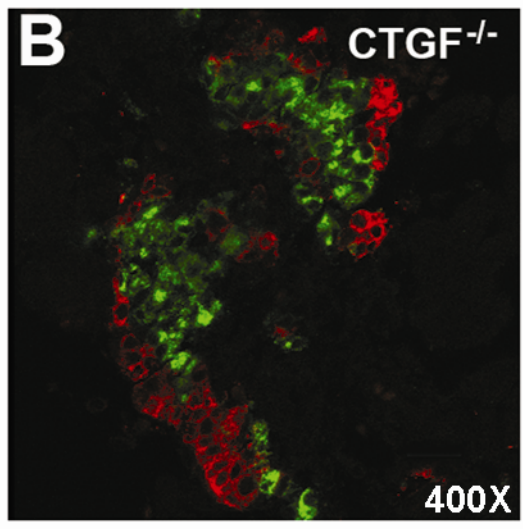

Supplement: me.2008-0045_2.pdf [file me.2008-0045_2.pdf]

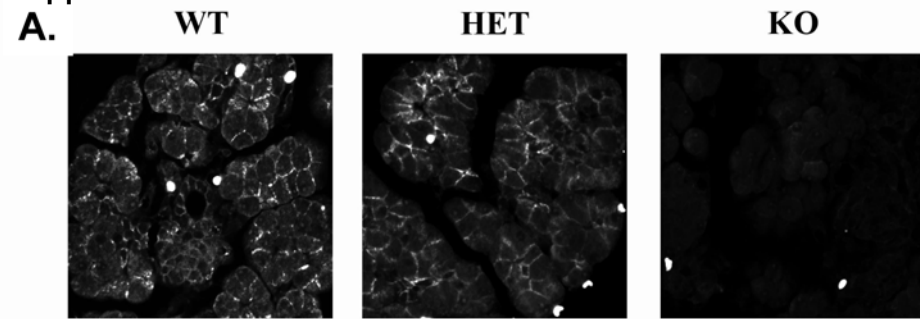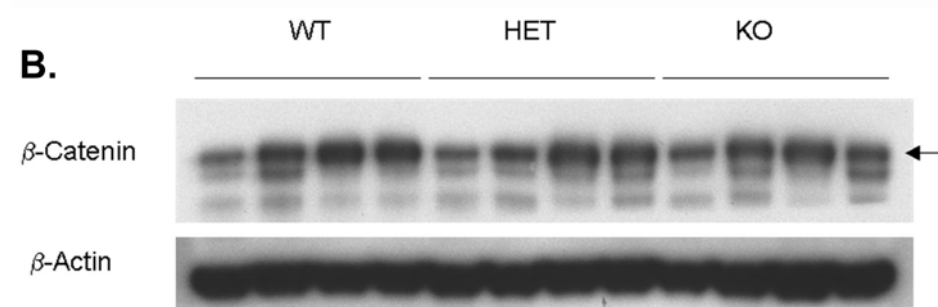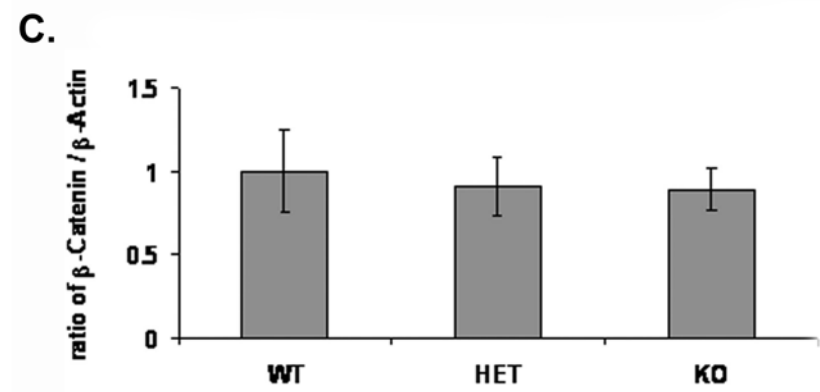

Supplement: me.2008-0045_3.pdf [file me.2008-0045_3.pdf]
